# Supplementary material for: From experimentation to adoption: a normative ethical analysis of large language models in health care
Source: Research Square preprint supplement (doi:10.21203/rs.3.rs-8553262/v1), 2026-01-23
Supplement: Supplementary file 1 [file 3b3d43f0f86d52f8060e120f.xlsx]

## Sheet: Sheet1
Table S1. Key empirical studies informing adoption-phase ethical analysis of LLMs in health care.
First author (Year)	Journal	Study design	Rank	Context of LLM use	Primary ethical relevance
Kim (2025)	Eur Radiol	Retrospective cross-over usability study	Core	Human–LLM collaboration for brain MRI differential diagnosis in a clinical workflow	Trust calibration and responsibility sharing in clinician-facing LLM-assisted decision support; identification of hallucination, contextualization, and input-quality risks affecting adoption
Rodler (2025)	PLoS One	Single-blinded randomized assessment (expert evaluation)	Core	Generation and translation of patient education materials aligned with oncology guidelines	Ethical responsibility for patient-facing information, role-sensitive deployment, and equity implications of readability and accessibility
Chen (2025)	J Med Internet Res	Multicenter qualitative interview study	Core	Everyday administrative use of LLM tools by hospital administrators	Institutional trust, governance gaps, and organizational responsibility as determinants of real-world adoption
Ebnali Harari (2025)	Int J Med Inform	Randomized controlled simulation study	Core	Clinician-supervised versus autonomous LLM decision support in emergency scenarios	Accountability, oversight, and trust formation; ethical necessity of supervision to prevent responsibility shifting to non-expert users
Campellone (2025)	J Med Internet Res	Exploratory randomized controlled trial	Core	Generative AI–based digital mental health intervention with technical guardrails	System-level governance, safety monitoring, and trust preservation in patient-facing LLM deployment
Homiar (2025)	BMJ Ment Health	Methodological evaluation study (prompt development + test/updates against human reference standard)	Core–Methodological / Infrastructure	Using GPT-4o prompts to screen titles/abstracts for a living systematic review workflow	Responsibility and transparency in evidence selection; trustworthiness and auditability of LLM-assisted screening to avoid missed inclusions; implications for governance of “living” evidence pipelines
Dennstädt (2025)	J Med Internet Res	Multicenter observational comparative study (blinded ratings)	Core	Locally deployed medical LLM answering real-world radiation oncology questions compared with senior experts	Trust and safety for clinical Q&A assistants; responsibility allocation when answers may be harmful; adoption-relevant evaluation in real clinical question settings
Du (2025)	J Med Internet Res	Two-phase double-blind observational study (AI vs clinician-created content; independent expert scoring; third-party adjudication)	Core	GPT-4 generating personalized self-management guidance for knee osteoarthritis based on anonymized patient profiles	Patient-facing trust and safety; responsibility for accuracy/personalization and oversight; equity implications via readability/health literacy and scalable personalization
Lee (2025)	BMC Emerg Med	Retrospective multicenter performance study using real-world ED conversations	Core	Evaluating multiple commercial LLMs for non-critical triage support using unsummarized dialogue	High-stakes trust calibration and safety in triage support; accountability for error/harm; governance implications of model/version variability and prompting choices in adoption
Kaster (2025)	J Neurodev Disord	Retrospective secondary-use EHR study (multi-institutional cohorts; LLM classification validated vs standardized assessments)	Core–Methodological / Infrastructure	Using GPT-3.5 Turbo / GPT-4 Turbo / GPT-4 Omni to extract functional biomarkers (verbal and ambulatory ability) from clinical notes across institutions	Privacy and data governance for secondary EHR use; responsibility for accuracy when automating sensitive functional status labels; equity concerns from variable documentation practices across sites and potential downstream bias
Naghdi (2025)	Hum Reprod	Comparative observational evaluation + expert scoring; tool/GUI development	Core	Applying multiple LLMs (GPT-3.5, GPT-4, Copilot, Gemini) to simplify reproductive genetics patient education materials, measuring readability and expert-rated clinical reliability	Health equity via improved health literacy; trust/safety trade-off between simplification and omission of critical information; transparency and clinician responsibility for patient-facing AI-assisted materials
Dorfner (2025)	J Am Med Inform Assoc	Benchmarking evaluation study (general-purpose vs biomedically fine-tuned LLMs across clinical tasks)	Core–Methodological / Infrastructure	Assessing whether biomedical fine-tuning improves LLM performance on clinical tasks; noting hallucination tendencies and generalization limits	Trustworthiness and safety for clinical deployment (hallucination risk); accountability for model selection/validation; implications for governance of “fine-tuned medical models” vs alternative strategies (e.g., retrieval augmentation)
Gürses (2025)	J Med Syst	Cross-sectional observational comparative study (LLM vs physiotherapist consensus; parameter agreement)	Core	Using ChatGPT-4o and Gemini Advanced to generate personalized knee OA rehabilitation programs compared with physiotherapist-designed consensus plans	Safety and responsibility in patient-specific care planning; need for human oversight due to gaps in exercise specificity/progression; risk of overreliance on plausible but incomplete recommendations
Turan (2024)	J Clin Anesth	Prospective multicenter diagnostic/decision-support agreement study (ASA I–IV; 2,851 patients)	Core	ChatGPT-4 assigning ASA physical status scores from anonymized standardized patient data; compared to anesthesiologists (kappa agreement)	Reliability and responsibility in preoperative risk stratification; boundary conditions where performance drops (complex ASA IV) and need for human oversight; governance for integrating LLM outputs into clinical workflows
Jin (2025)	J Med Internet Res	Noninterventional observational evaluation of 20 RCTs (published/registered after Jan 2024)	Core–Methodological / Infrastructure	Using GPT-4-Turbo-Preview to generate RCT design elements (eligibility, recruitment, interventions, outcomes) and comparing to ground truth + expert ratings	Research integrity and accountability in trial design; bias/inclusivity and diversity impacts of AI-generated criteria; need for expert oversight/regulatory guardrails to maintain safety and ethical standards
Yang (2025)	J Med Internet Res	Multicenter cross-sectional mixed-methods observational study (surveys: 240 HCPs + 480 patients/caregivers; interviews n=30)	Core	LLM adoption for medical information/decision support; predictive models (LR/RF/XGBoost) with SHAP interpretability; qualitative themes on trust/readiness	Trust, privacy, legal accountability, digital literacy, and institutional readiness as determinants of ethical adoption; equity/access and role-sensitive governance for LLM deployment
Leng (2025)	Obes Surg	Preliminary evaluation/feasibility assessment using expert-rated question set (30 bariatric surgery questions; 3 experts)	Core	ChatGPT-4 as a knowledge resource for bariatric surgery information; guideline-alignment scored; limitations noted (outdated/unspecific/structure issues)	Misinformation and currency of evidence; safe use as supplementary tool (not standalone); privacy and accountability concerns when used for patient education/clinical support
Pérez-Esteve (2025)	J Med Internet Res	Observational comparative case study (10 home care scenarios; rubric vs professional gold standard; compares GPT-3.5, GPT-4o, Copilot)	Core	LLM-generated home care instructions for training informal caregivers; evaluation of specificity/clarity/self-efficacy and error/omission rates	Safety and reliability of caregiving guidance; risk from omissions/incorrect advice; need for benchmarking against professional standards, transparency, and safeguards for vulnerable users
Kämmer (2024)	BMJ Open	Study protocol for prospective randomized experiment (N=158 medical students; LLM coach vs human coach; training vs no training)	Core–Methodological / Infrastructure	ChatGPT used as conversational “coach” during diagnostic work on patient vignettes; measures diagnostic process, accuracy, confidence, and search behavior	Over-reliance vs appropriate trust calibration; impact on clinical reasoning and diagnostic safety; value of training to promote critical evaluation of LLM outputs
Rinderknecht (2025)	J Med Internet Res	Large-scale generative AI performance evaluation (204 prostate cancer articles; abstracts processed with 2 prompts; 2 clinician raters)	Core	ChatGPT-4 generates lay summaries; evaluated readability (FKRE), factual accuracy (Likert), and word-count compliance; prompt design tested	Patient-centered communication: readability vs accuracy trade-offs; governance for AI-assisted science communication; need for layperson validation and editorial oversight to prevent misleading simplification
Azevedo (2025)	J Pediatr Surg	Cross-sectional observational single-center comparison (May–Jun 2024; 102 paired evaluations)	Core	ChatGPT-4o generates personalized informed-consent documents; surgeons and legal representatives rate 8 quality parameters	Informed consent ethics: comprehension, autonomy, readability, and personalization; accountability for AI-generated consent, risk of omissions/incorrect statements, and need for clinician oversight
Fink (2025)	Eur Radiol	Prospective proof-of-concept study on synthetic data (100 radiology reports; 50 injuries; expert evaluation by 3 radiologists)	Core	Retrieval-augmented generation (TraumaCB) adds curated domain sources to GPT-4; compared with generic GPT-4 on diagnosis/classification/grading; trust/explanation rated	Clinical safety & verification: RAG for transparency and reduced hallucination; need for validated sources, auditability, and boundaries when classification systems are uncertain
Umman (2025)	Transplant Proc	Prospective observational study (Oct 2023–Jul 2024; 196 patients; 1281 questions)	Core	AI-based patient education using ChatGPT integrated with WhatsApp + CRM; physician retrospective rating of accuracy/safety; satisfaction via SAPS	Patient education ethics: safety, misinformation risk, privacy/data governance in messaging platforms, accountability and escalation pathways for high-risk queries
Wang (2025)	J Med Internet Res	Quasi-experimental study with comparison group (Hong Kong; ≥65y; n=45 intervention vs 55 comparison; 3-month follow-up)	Core	ChatGPT with retrieval-augmented generation (SIV-ChatGPT) to promote influenza vaccination; validated uptake via receipts; usability (SUS) and engagement assessed	Public health intervention ethics: equitable access for older adults, transparency of AI role, avoidance of persuasive manipulation, and safety of vaccine information (RAG as mitigation)
Chen (2025)	J Med Internet Res	Preregistered randomized web-based survey experiment (US national sample; n=1762; 4 groups)	Core	Manipulates disclosure of doctor’s AI-assisted diagnosis (none/no AI/moderate/extensive) to test trust and help-seeking intention	Trust and disclosure ethics: “AI trust gap”; implications for communication strategies, informed transparency, and acceptance of AI-assisted care
Fukui (2025)	Radiol Phys Technol	System development + human expert evaluation study (institutional manuals; hybrid retrieval; GPT-3.5/GPT-4o; 4-point Likert by 3 technologists; RAGAS for automated eval)	Core–Methodological / Adjacent	RAG QA using 40 institutional nuclear medicine manuals; hybrid dense+BM25 retrieval; compares models; evaluates with experts and LLM-based metrics (RAGAS)	Safety & local protocol fidelity: institution-specific guidance reduces outdated knowledge; evaluation ethics of automated scoring; need for governance when protocols vary and update frequently
Urbina (2025)	Arch Phys Med Rehabil	Observational bias analysis (N=300 prompts/outputs; linguistic coding)	Core	ChatGPT and Google Gemini generated descriptions of people (with/without disability; patients/athletes with disability); outputs coded for favorable vs limiting qualities	Equity and disability ethics: quantifiable “ability bias,” representational harms, exclusion of disabled people; implications for fair deployment in medical/educational systems
Qi (2025)	JMIR Form Res	Observational exam-benchmark study (2024 Taiwan audiologist qualification exam; 300 MCQs; McNemar test; reasoning paths recorded)	Core	Compared GPT-4-turbo vs DeepSeek-R1 on Chinese standardized exam; analyzed overall and domain-specific accuracy; noted poor performance on graph-based items	Education/credentialing ethics: risk of overreliance, false confidence from high MCQ scores, limitations on multimodal/graph questions; need for supervised use and boundaries before clinical training deployment
Leung (2025)	JAMA Netw Open	Randomized clinical trial online (Sep 2–19, 2024; 2×4 design; n=614; 30,700 ad ratings)	Peripheral	Generative AI used (with youth codesign) to create vaping awareness social media ads; tested perceived message effectiveness vs existing health-agency ads and tested source labeling effects	Public health communication ethics: effectiveness vs manipulation; transparency/labeling (no PME effect here) but governance still needed; safeguarding against misleading/unsafe health messaging at scale
Lee (2025)	BMC Med Educ	Pilot randomized controlled trial (final-year Korean medicine students; n=19)	Core	GPT-4o/Claude 3.5-based chatbot for OSCE prep (scenario responses + automated feedback) vs peer role-play; OSCE performance and learner experience compared	Education ethics: validity of AI feedback, fairness/access, dependency and skill transfer; need for oversight and safe design when teaching clinical communication and reasoning
Liu (2025)	JMIR Form Res	Single-arm mixed methods feasibility study (n=29; pre-post surveys + conversation analysis + interviews)	Core–Methodological / Adjacent	GPT-4–powered smoking cessation counseling chatbot (Aipaca) structured by 5A’s; analyzed preparedness changes and interaction patterns	User safety & behavior change ethics: accuracy safeguards, accountability/longitudinal support, cultural resonance, and nonjudgmental counseling; governance for clinical deployment of GenAI behavioral interventions
Bucak (2025)	Arch Osteoporos	Multicenter cross-sectional comparative study (100 scenarios derived from 206 osteoporosis patients; compared to 5 physiatrists)	Core–Methodological / Adjacent	ChatGPT-4.0 generated diagnoses and treatment recommendations; compared accuracy/completeness and response time to clinicians	Clinical decision support ethics: high reported accuracy but nontrivial incompleteness; need for oversight, validation against guidelines, and risk management if used for triage or treatment recommendations
La Bella (2024)	Pediatr Rheumatol Online J	Multicenter expert survey / reliability study (15 questions repeated 3 times; 9 experts; Likert scoring; ICC/Krippendorff alpha)	Core–Methodological / Adjacent	Microsoft Copilot with ChatGPT-4.0 answered pediatric FMF questions; experts rated accuracy; assessed intra-/interrater reliability and trust	Epistemic safety & reliability: response variability and poor agreement undermine trust; emphasizes need for expert validation, cautious use, and governance before clinical info use in pediatrics
Ma (2025)	BMC Med Educ	Randomized controlled trial (n=126 dental undergrads; AI vs human exam papers; psychometrics + feedback)	Core	GPT-4 generated a 90-item MCQ periodontology exam; compared with institution’s 2024 human-designed final exam	Assessment validity & fairness: AI exams improved content coverage but had lower discrimination and worse student-perceived appropriateness; supports “hybrid AI-human” approach and cautions against high-stakes use
Safran (2025)	BMC Musculoskelet Disord	Cross-sectional observational guideline-alignment study (20 questions; 2 raters; Likert scoring; weighted kappa)	Core–Methodological / Adjacent	ChatGPT (GPT-4) generated answers for musculoskeletal rehab questions; compared against evidence-based clinical practice guidelines	Clinical decision support ethics: clarity high but consistency/completeness lower and rehab reasoning weaker; emphasizes supplementary (not autonomous) use and need for reliability checks
Yıldırım (2025)	Scand J Trauma Resusc Emerg Med	Retrospective diagnostic accuracy study (high-acuity respiratory ED cases with pulmonology consult + chest CT; n=221; Nov 2024–Feb 2025)	Core	GPT-4o prompted to predict ED disposition (discharge/ward/ICU) under 3 input models of increasing clinical detail	High-stakes triage ethics: overtriage vs missed discharge; risk of unsafe autonomy; dataset limitations and need for prospective validation, governance, and human oversight
Alanzi (2025)	Nutr Health	Quasi-experimental intervention / survey-based empirical study (4-week use; n=399 outpatients with anxiety in Saudi Arabia)	Core	Participants used ChatGPT as a “psychotherapist” tool; outcomes focused on perceived effectiveness/acceptability and concerns (privacy/ethics)	Mental health safety & privacy: risk of harm, inadequate crisis handling, confidentiality, dependency; highlights demand for safeguards, oversight, and clear boundaries vs professional therapy
Radulesco (2025)	Aesthetic Plast Surg	Comparative observational study (STROBE; facial injection planning; n=40; photos; Jul–Oct 2024; Likert scoring with Friedman/Durbin-Conover tests)	Core	Multiple AI chatbots + generative vision models generated aesthetic injection treatment plans; ChatGPT-based models (ChatGPTo1/ChatGPT-4o) scored highest; vision models failed at visual annotation	High-stakes procedural safety: risk of unsafe plans/overconfidence; authors state safety limitations preclude unsupervised use; emphasizes need for clinician oversight and validation
Reading Turchioe (2024)	J Am Med Inform Assoc	Mixed-methods experimental feasibility study with randomization within course (nursing PhD students; n=9; alternating assignments)	Core–Methodological / Adjacent	ChatGPT used as programming support for All of Us Researcher Workbench analyses (code generation/troubleshooting); reported helpful but occasionally inaccurate	Research integrity & training: reliance on LLM code may introduce errors; supports use as “scaffolding” alongside other resources (oversight and verification norms)
Shin (2025)	Appl Clin Inform	Rapid randomized quality improvement trial (pediatric subspecialists; DAX Copilot May–Jul 2024; difference-in-differences; EHR logs + survey + qualitative sentiment)	Core	AI scribe (Microsoft/Nuance DAX Copilot) generated note text from encounter recordings; used in 53% of notes; improved clinician experience/burnout but no significant change in pajama time/time in notes/wRVUs	Clinical workflow ethics: privacy/consent for recording, data governance/vendor risk; automation bias and documentation accuracy; benefit mainly in experience rather than measurable time savings
Mohammad Azmi (2025)	PLOS One	Trial protocol: prospective single-masked parallel-group non-inferiority RCT (colonoscopy prep counseling; ntotal=96; ChatGPT-4.0 vs standard counseling; registered NCT06905782; SPIRIT 2025 + SPIRIT-AI)	Core–Methodological / Adjacent	ChatGPT-4.0 chatbot provides bowel-prep counseling; outcomes include BBPS (primary), anxiety (DASS-21), satisfaction (PSQ-18)	Patient education ethics: safety of advice, misinformation risk, equity/access in resource-limited settings; protocol explicitly aligns with SPIRIT-AI (transparency/reporting of AI intervention)
Vandelanotte (2025)	Trials	Protocol: randomized controlled trial (n=198; adults recruited via Facebook; outcomes baseline/3/6 months; primary = device-measured MVPA via Axivity AX3)	Core	Intervention is an app-based digital assistant using ML (reinforcement learning, NLP, and large language models) for: (1) educational conversations, (2) just-in-time personalized nudges, (3) chat-based Q&A; adaptive goal setting/action planning	AI-as-intervention ethics: personalization/nudging & autonomy, data privacy from continuous sensing + app logs, bias/equity (recruitment via social media; differential engagement), transparency and safety of LLM-generated guidance in health behavior change
Dougherty (2025)	Psychopharmacology (Berl)	Secondary predictive modeling using trial-session transcripts (audio-recorded therapy support session 1 day post-psilocybin; sentiment + EBI used to predict MADRS response; CV accuracy/AUC reported)	Core–Methodological / Adjacent	Zero-shot NLP classifier based on BART LLM used to derive 2D sentiment (valence/arousal) from participant/therapist transcripts; used as predictors in logistic regression models	High-sensitivity data ethics: using psychotherapy transcripts (privacy, consent, re-identification risk); algorithmic inference in mental health (bias, explainability, clinical consequences if used for triage); sponsor COI transparency
Xu (2025)	Genome Biol	Computational methods paper: deep learning spot detector + dataset creation/benchmarking; integrates LLMs for AI-assisted FISH diagnosis	Core	U-FISH is deep learning for spot detection; additionally described as first spot detection software integrated with large language models for AI-assisted diagnostics	AI-in-diagnostics ethics: validation/generalizability across imaging domains, error propagation from detection→diagnostic narrative, accountability/traceability of LLM component; dataset governance and reproducibility (public/anonymized noted)
